# Supplementary material
Source: MDPI journal article supplement (https://www.mdpi.com/2410-3888/9/2/72)
Supplement: s1 [file s1]

**Table S1.** Descriptive statistics of the morphological traits of female and male whelks (n = 30).

| Trait     | Female  |         |         |          |          |       | Male    |         |         |          |          |      |
|-----------|---------|---------|---------|----------|----------|-------|---------|---------|---------|----------|----------|------|
|           | Mean    | SD      | SE      | Skewness | Kurtosis | CV/%  | Mean    | SD      | SE      | Skewness | Kurtosis | CV%  |
| log2(BM)  | 5.10 g  | 0.53 g  | 0.10 g  | -0.10    | -1.25    | 10.47 | 4.55 g  | 0.19 g  | 0.03 g  | -0.11    | -0.16    | 4.17 |
| log2(STM) | 4.83 g  | 0.59 g  | 0.11 g  | -0.08    | -1.42    | 12.15 | 4.25 g  | 0.19 g  | 0.03 g  | -0.03    | -0.01    | 4.42 |
| log2(SH)  | 5.52 mm | 0.16 mm | 0.03 mm | 0.16     | -1.52    | 2.99  | 5.36 mm | 0.06 mm | 0.01 mm | -0.03    | 0.04     | 1.20 |
| log2(SW)  | 4.94 mm | 0.24 mm | 0.04 mm | 0.62     | 0.22     | 4.93  | 4.74 mm | 0.08 mm | 0.01 mm | 0.40     | 1.56     | 1.72 |
| log2(SAH) | 5.06 mm | 0.25 mm | 0.05 mm | -1.35    | 2.95     | 4.87  | 4.87 mm | 0.17 mm | 0.03 mm | -1.62    | 5.96     | 3.50 |
| log2(SAW) | 4.28 mm | 0.19 mm | 0.03 mm | 0.03     | -0.93    | 4.36  | 4.12 mm | 0.13 mm | 0.02 mm | -0.28    | 0.86     | 3.06 |
| log2(BWH) | 5.20 mm | 0.16 mm | 0.03 mm | 0.04     | -1.29    | 3.07  | 5.05 mm | 0.06 mm | 0.01 mm | -0.34    | -0.42    | 1.29 |
| log2(BWW) | 5.03 mm | 0.20 mm | 0.04 mm | 0.19     | -1.24    | 3.95  | 4.83 mm | 0.11 mm | 0.02 mm | -0.92    | 2.34     | 2.22 |
| log2(SWH) | 3.47 mm | 0.31 mm | 0.06 mm | -0.29    | -1.08    | 8.85  | 3.15 mm | 0.31 mm | 0.06 mm | -0.95    | 2.21     | 9.73 |
| log2(SWW) | 3.93 mm | 0.26 mm | 0.05 mm | -0.15    | -1.42    | 6.71  | 3.64 mm | 0.16 mm | 0.03 mm | -0.23    | -0.22    | 4.32 |
| BM /g     | 36.47   | 12.87   | -       | -        | -        | -     | 23.68   | 3.05    | -       | -        | -        | -    |
| STM /g    | 28.90   | 14.03   | -       | -        | -        | -     | 19.15   | 2.45    | -       | -        | -        | -    |
| SH /mm    | 43.10   | 12.60   | -       | -        | -        | -     | 41.22   | 1.74    | -       | -        | -        | -    |
| SW /mm    | 29.30   | 9.51    | -       | -        | -        | -     | 26.60   | 1.51    | -       | -        | -        | -    |
| SAH /mm   | 31.93   | 9.62    | -       | -        | -        | -     | 28.77   | 4.39    | -       | -        | -        | -    |
| SAW /mm   | 18.18   | 5.54    | -       | -        | -        | -     | 17.50   | 1.45    | -       | -        | -        | -    |
| BWH /mm   | 34.51   | 10.03   | -       | -        | -        | -     | 33.13   | 1.40    | -       | -        | -        | -    |
| BWW /mm   | 30.88   | 9.35    | -       | -        | -        | -     | 28.52   | 2.04    | -       | -        | -        | -    |
| SWH /mm   | 10.50   | 3.62    | -       | -        | -        | -     | 9.15    | 1.76    | -       | -        | -        | -    |
| SWW /mm   | 14.45   | 4.66    | -       | -        | -        | -     | 12.53   | 1.33    | -       | -        | -        | -    |

BM: body mass; STM: soft tissue mass; SH: shell height; SW: shell width; SAH: shell aperture height; SAW: shell aperture width; BWH: body whorl height; BWW: body whorl width; SWH: spiral whorl height; SWW: spiral whorl width; SE: standard error; SD: standard deviation; CV: coefficient of variation.
